# Supplementary material for: Chitosan-capped silver nanoparticles with potent and selective intrinsic activity against the breast cancer cells
Source: publisher site journal article supplement (doi:10.1515/ntrev-2022-0546), 2023-01-01
Supplement: Supplementary file 1 [file ntrev-2022-0546_sm.pdf]

# Supplementary material

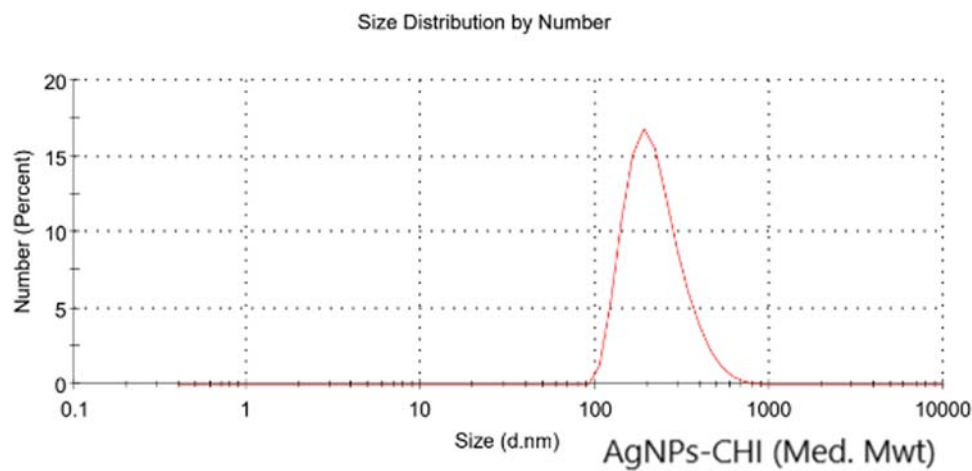

Figure S1: Dynamic light scattering of the formulated silver nanoparticles' mean size (nm) reduced with med molecular weight chitosan.

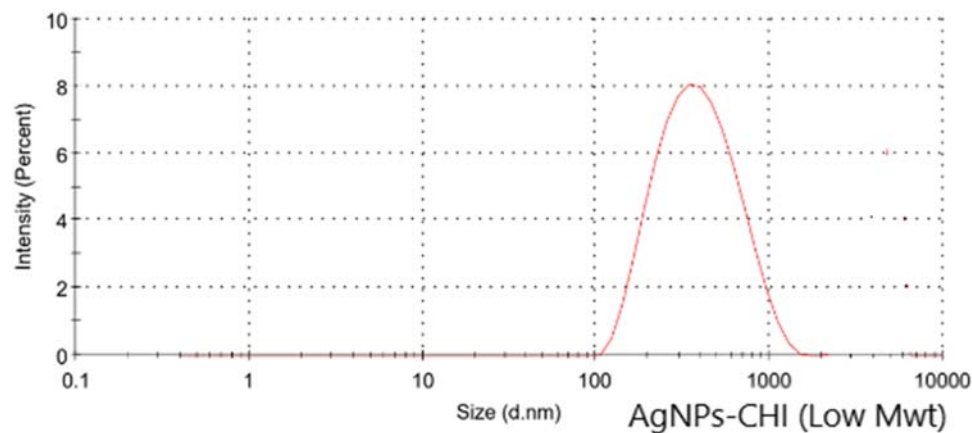

Figure S2: Dynamic light scattering of the formulated silver nanoparticles' mean size (nm) reduced with low molecular weight chitosan.

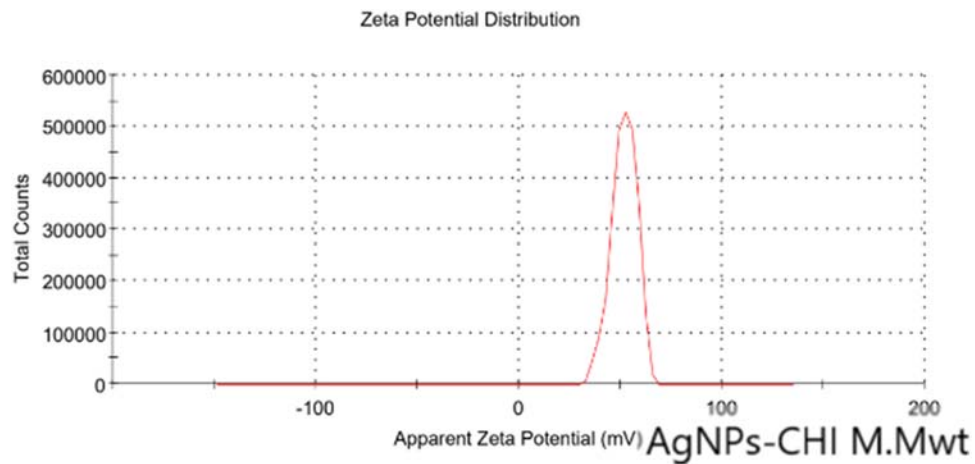

**Figure S3:** Zeta potential (mV) determined with a dynamic light scattering of the formulated silver nanoparticles reduced with medium molecular weight chitosan.

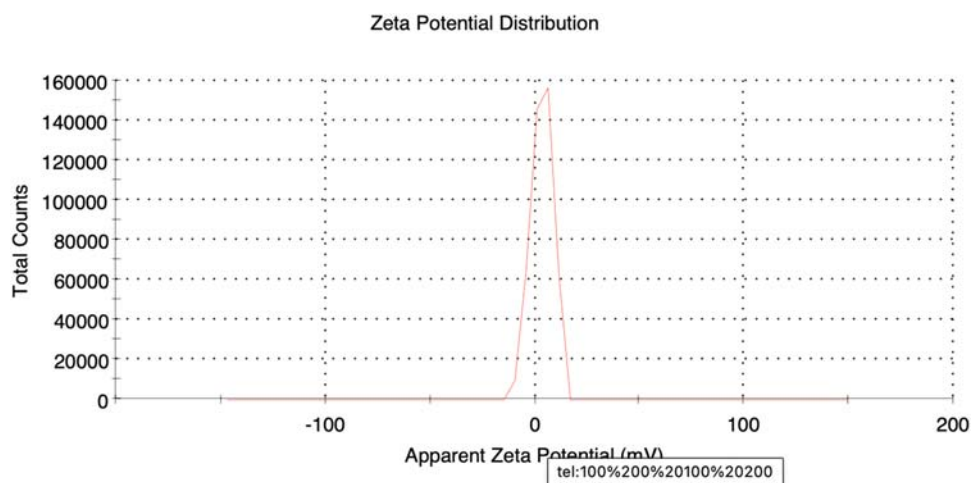

**Figure S4:** Zeta potential (mV) determined with a dynamic light scattering of the formulated silver nanoparticles reduced with low molecular weight chitosan.
